# Supplementary material for: MnO2/graphene composite electrodes for supercapacitors: the effect of graphene intercalation on capacitance
Source: Royal Society of Chemistry journal article supplement (doi:10.1039/c1jm13364k), 2011-01-01
Supplement: c1jm13364k.pdf [file c1jm13364k.pdf]

## Supporting Information

### **MnO<sub>2</sub>/graphene composite electrodes for supercapacitors: The effect of graphene intercalation on capacitance**

**Hyuck Lee<sup>a</sup>, Junmo Kang<sup>b</sup>, Mi Suk Cho<sup>a</sup>, Jae-Boong Choi<sup>c</sup>, Youngkwan Lee<sup>a\*</sup>**

*<sup>a</sup> School of Chemical Engineering,*

*<sup>b</sup> SKKU Advanced Institute of Nanotechnology,*

*<sup>c</sup> Department of Mechanical Engineering,  
Sungkyunkwan University, 440-746 Suwon, Korea*

**\* Corresponding authors: [yklee@skku.edu](mailto:yklee@skku.edu)**

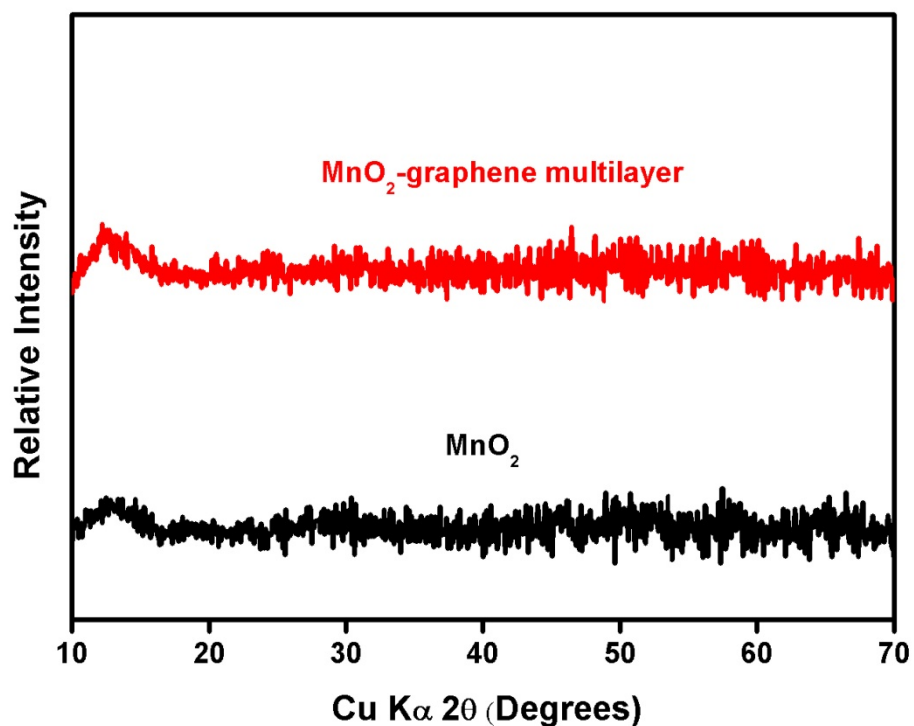

**Fig. S1. XRD pattern of MnO<sub>2</sub> and MnO<sub>2</sub>-graphene multilayer**

The crystal phases of the electrodeposited MnO<sub>2</sub> were investigated by the XRD. Figure S1 shows the XRD patterns of the pure MnO<sub>2</sub>, and MnO<sub>2</sub>-graphene multilayer. There is no specific peak of crystalline MnO<sub>2</sub> indicating the amorphous structure of MnO<sub>2</sub>.
